# Supplementary material for: Network-medicine framework for studying disease trajectories in U.S. veterans
Source: PubMed Central journal article supplement (PMC9283486; doi:10.1038/s41598-022-15764-9), 2022-07-14
Supplement: 41598_2022_15764_MOESM1_ESM.pdf [file 41598_2022_15764_MOESM1_ESM.pdf]

## Supplementary Information

### Supplementary Note 1

When building the Temporal Disease Network (TDN), we removed erroneous entries, defined by disease-disease co-occurrences with less than 100 patients or co-occurrences in which the second disease is reported after the patient is deceased. Here, we analyze the network of disease co-occurrences that were filtered out of the TDN to evaluate whether there is any specific disease category that is overrepresented among erroneous entries.

All ICD-9 codes in the dataset ( $n=929$ ) are represented among the filtered co-occurrences. The codes that were filtered and that are not present in TDN ( $n=211$ ) are mostly related to the following disease categories: infectious and parasitic diseases; complications of pregnancy, childbirth, and the puerperium; injury and poisoning, and conditions originating from the perinatal period (Figure S1).

We built a network only of the disease-disease co-occurrences that were filtered and compared with those in TDN. We compared the normalized weighted degree (Z-score) across disease categories, calculating a T-test p-value followed by Benjamini-Hochberg correction between filtered and TDN networks for each disease category. We observed the following disease categories showed higher number of connections among the filtered co-occurrences ( $\text{adj-pvalue} < 0.05$ ): congenital anomalies; diseases of the digestive system; diseases of the respiratory system; infectious and parasitic diseases;

injury and poisoning; neoplasms, and symptoms, signs, and ill-defined conditions (Figure S2).

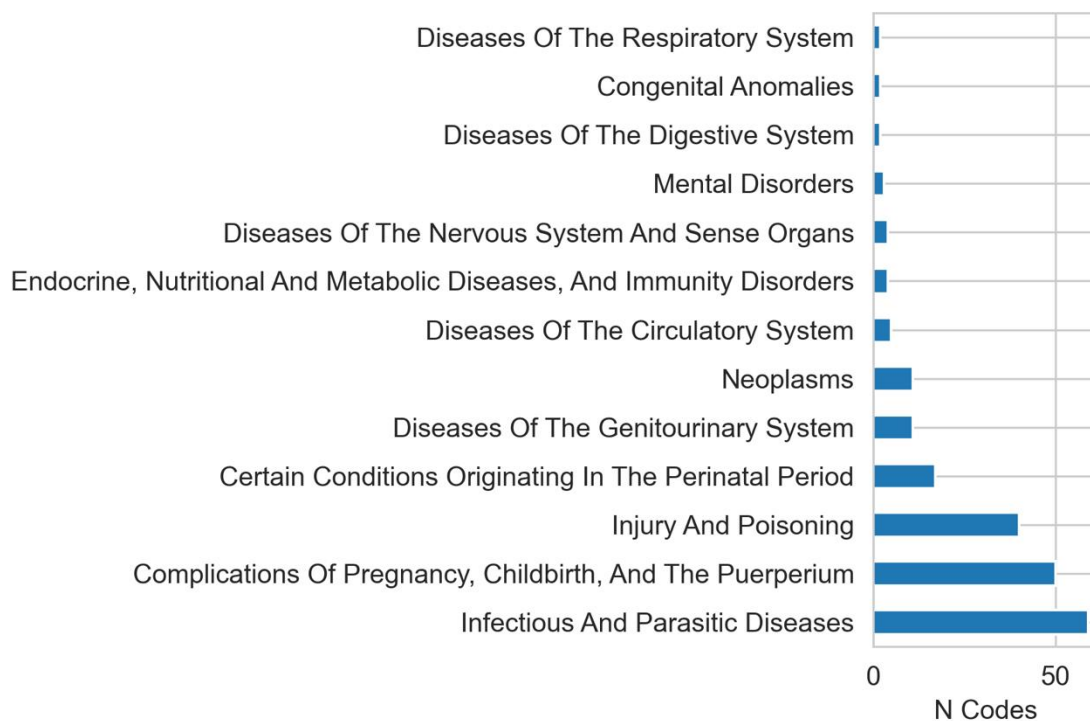

**Figure S1** – Number of ICD-9 codes that were filtered out from the analysis and that are not included in the Temporal Disease Network.

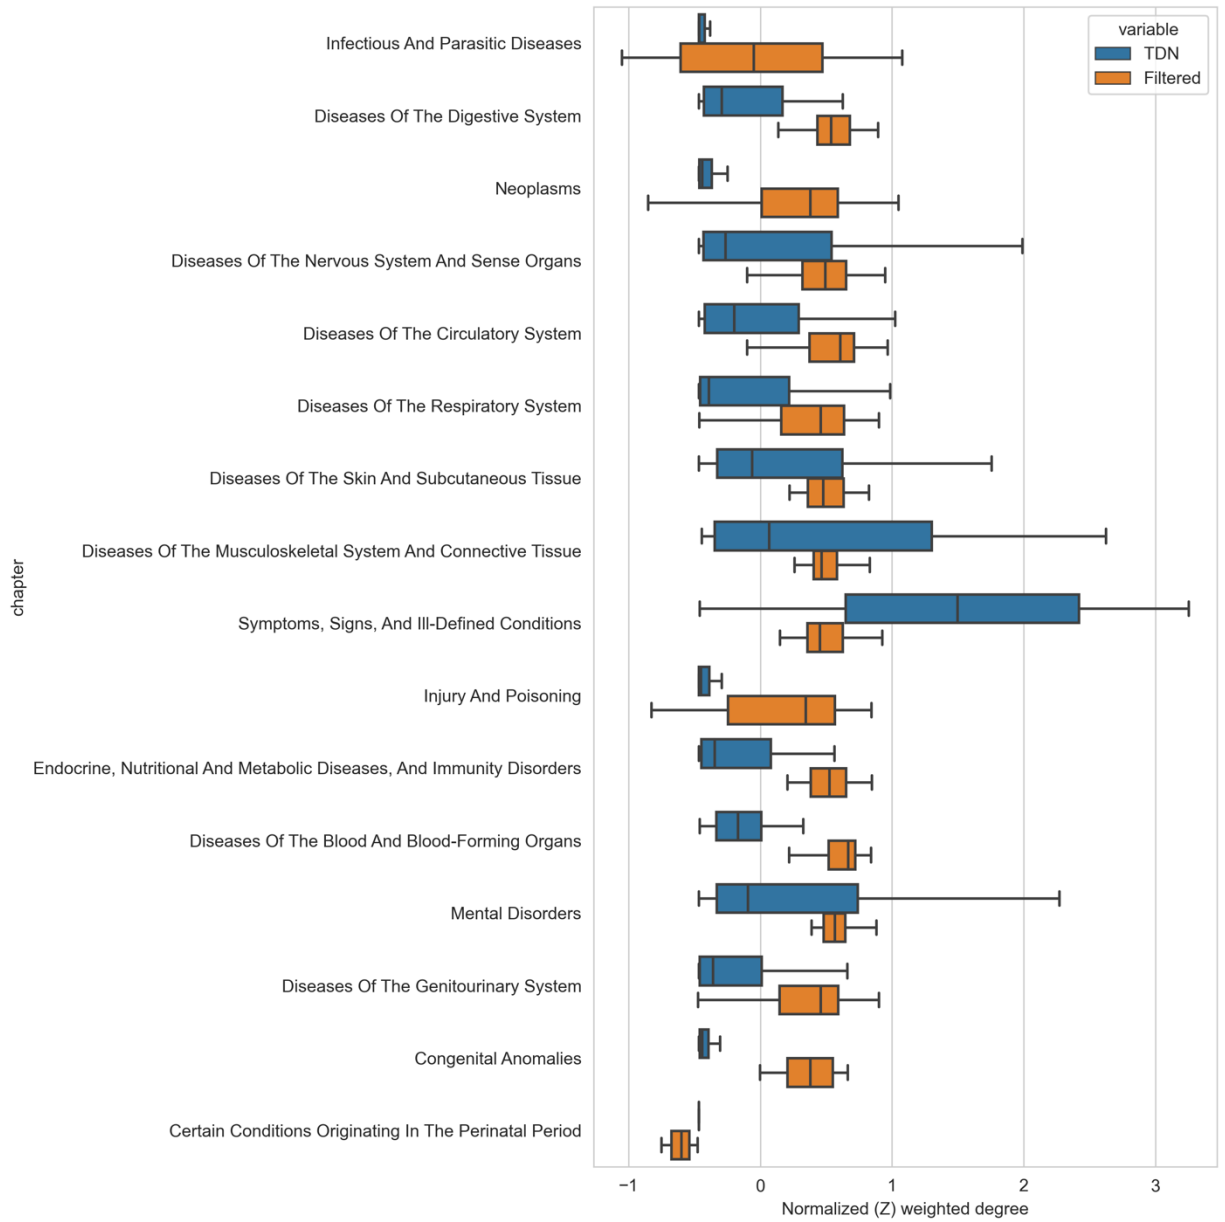

**Figure S2** – Distribution of normalized weighted degree for nodes in TDN and in the network formed by disease-disease co-occurrences considered as erroneous entries in this study.

**Table S1** – Comparison of previous network medicine studies evaluating disease networks based on Electrical Health Record (HER) datasets.

| Reference | Study                                                                                                                              | Patients   | Nodes                                    | Edges                                     | Link Confidence                                                     | Age                                                                                               | Male/Female                                                                                       | Ethnicity                           |
|-----------|------------------------------------------------------------------------------------------------------------------------------------|------------|------------------------------------------|-------------------------------------------|---------------------------------------------------------------------|---------------------------------------------------------------------------------------------------|---------------------------------------------------------------------------------------------------|-------------------------------------|
| 8         | Hidalgo et al 2009 A Dynamic Network Approach for the Study of Human Phenotypes                                                    | 13,039,018 | ICD9: 657 (3-digit) and 16,459 (5-digit) | 291,172 (3-digit) and 6,088,553 (5-digit) | Relative Risk and Pearson's correlation for binary variables        | 65+ (Medicare)                                                                                    | 58.3% female                                                                                      | 90.1% white, 7.6% black, 2.3% other |
| 9         | Chmiel et al 2014 Spreading of diseases through comorbidity networks across life and gender                                        | 1,862,258  | ~100-500                                 | Not reported                              | Chi-square test                                                     | 0-8, 8-16, 16-24, 32-40, 40 - 48, 48 - 56, 56-64, 64 - 72                                         | 57.1% female                                                                                      | Not reported                        |
| 10        | Jeong et al 2017 Network-based analysis of diagnosis progression patterns using claims data                                        | 1,111,007  | 775                                      | 4,100                                     | Fisher's exact followed by Bonferroni adjustment                    | 0-85+                                                                                             | Not reported                                                                                      | Not reported                        |
| 11        | Westergaard et al 2019 Population-wide analysis of differences in disease progression patterns in men and women                    | 6,909,676  | 1,306                                    | 27,185                                    | Pearson correlation                                                 | All ages in national (Denmark) health registry                                                    | 48.2% female                                                                                      | Mostly European                     |
| 12        | Park et al 2009 The impact of cellular networks on disease comorbidity                                                             | 13,039,018 |                                          | 2,239                                     | Pearson correlation with relative risk and $\phi$ -correlation      | 65+ (Medicare)                                                                                    | 58.3% female                                                                                      | 90.1% white, 7.6% black, 2.3% other |
| 13        | Klimek et al 2016 Disentangling genetic and environmental risk factors for individual diseases from multiplex comorbidity networks | 1,862,258  | 358                                      | Not reported                              | Contingency coefficient, Wilcoxon rank sum test, Benjamini-Hochberg | 11 age groups 0-7, 8-15, etc                                                                      | 57.1% female                                                                                      | Not reported                        |
| 14        | Jensen et al 2014 Integrated Text Mining and Chemoinformatics Analysis Associates Diet to Health Benefit at Molecular Level        | NA         | 7,178 plants, 1,613 diseases             | 38,090                                    | Fisher's exact followed by Benjamini-Hochberg                       | NA                                                                                                | NA                                                                                                | NA                                  |
| 15        | Beck et al 2017 Temporal order of disease pairs affects subsequent disease trajectories: The case of diabetes and sleep apnea      | 6,923,849  | 37                                       | 103                                       | Cochran-Mantel-Haenszel test followed by Benjamini-Hochberg         | Poisson regression run to predict # of comorbidities for all patients to avoid age or gender bias | Poisson regression run to predict # of comorbidities for all patients to avoid age or gender bias | Danish subjects                     |
| 16        | Giannoula et al 2018 Identifying temporal patterns in patient disease trajectories                                                 | 643,358    | Not reported                             | 3,153 (men), 3,864 (women)                | Fisher's exact followed by Bonferroni adjustment                    | Mean for men and women ~60                                                                        | 52.8% female                                                                                      | Regional Spanish health registry    |

|    |                                                                                                                                                    |              |       |         |                                                                                  |                                                                                      |                                                                                                                                                               |                         |
|----|----------------------------------------------------------------------------------------------------------------------------------------------------|--------------|-------|---------|----------------------------------------------------------------------------------|--------------------------------------------------------------------------------------|---------------------------------------------------------------------------------------------------------------------------------------------------------------|-------------------------|
|    | using dynamic time warping: A population-based study                                                                                               |              |       |         |                                                                                  |                                                                                      |                                                                                                                                                               | (province of Catalonia) |
| 17 | Siggaard et al 2020 Disease trajectory browser for exploring temporal, population-wide disease progression patterns in 7.2 million Danish patients | 7,186,865    | 928   | 9,608   | P-values estimated using binomial distribution followed by Bonferroni adjustment | Patient matching is used to control for sex, age, discharge type, and discharge week | Patient matching is used to control for sex, age, discharge type, and discharge week. Sex-specific traits are computed using separate male/female populations | Danish subjects         |
| 18 | Lee et al 2019 Inference on chains of disease progression based on disease networks                                                                | 13,039,018   | 1,692 | 468,285 | Ratio of relative risk                                                           | Not reported                                                                         | Not reported                                                                                                                                                  | Not reported            |
| 19 | Vlietstra et al 2020 Identifying disease trajectories with predicate information from a knowledge graph                                            | Not reported | 453   | 2,530   | Binomial test                                                                    | All ages in Danish hospital record                                                   | Not reported                                                                                                                                                  | Danish subjects         |
